# Supplementary material for: Computational screening and mechanistic insights of oxygen-terminated MOenes for electrocatalytic hydrogen evolution
Source: Royal Society of Chemistry journal article supplement (doi:10.1039/d5cc06318c), 2026-01-01
Supplement: d5cc06318c1.pdf [file d5cc06318c1.pdf]

**Electronic Supplemental Information for**

**Computational screening and mechanistic insights of oxygen-terminated  
MOenes for electrocatalytic hydrogen evolution†**

Meng Tian\*

School of New Energy, Nanjing University of Science and Technology, Jiangyin 214443, Jiangsu,  
China

\*Corresponding author: tianmeng@njjust.edu.cn

**Computational details**

Density functional theory (DFT) calculations were performed using the Vienna *ab initio* simulation package (VASP).<sup>1</sup> Perdew-Burke-Ernzerhof functional (PBE) with the generalized gradient approximation was adopted to compute the exchange-correction functional.<sup>2</sup> Valence electron configurations of the pseudopotentials were set as 3p<sup>6</sup>3d<sup>1</sup>4s<sup>2</sup> for Sc, 3d<sup>2</sup>4s<sup>2</sup> for Ti, 3p<sup>6</sup>3d<sup>3</sup>4s<sup>2</sup> for V, 3d<sup>5</sup>4s<sup>1</sup> for Cr, 4s<sup>2</sup>4p<sup>6</sup>4d<sup>1</sup>5s<sup>2</sup> for Y, 4s<sup>2</sup>4p<sup>6</sup>4d<sup>2</sup>5s<sup>2</sup> for Zr, 4p<sup>6</sup>4d<sup>4</sup>5s<sup>1</sup> for Nb, 4p<sup>6</sup>4d<sup>5</sup>5s<sup>1</sup> for Mo, 5d<sup>2</sup>6s<sup>2</sup> for Hf, 5d<sup>3</sup>6s<sup>2</sup> for Ta, 5d<sup>4</sup>6s<sup>2</sup> for W, 2s<sup>2</sup>2p<sup>4</sup> for O, 3s<sup>2</sup>3p<sup>4</sup> for S, 4s<sup>2</sup>4p<sup>4</sup> for Se, 5s<sup>2</sup>5p<sup>4</sup> for Te, respectively. The assumed orbital angular momentum (L), spin angular momentum (S), and total angular momentum (J) are computed based on these valence electron configurations, as shown in Table S1. All MOenes models were built with a 15-Å thickness vacuum along z-axis. The element substitution method was employed to achieve doping strategy. The energy-correction term of van der Waals dispersion for 2D MOenes was computed with DFT + D3 method.<sup>3</sup> The spin-orbital coupling was considered due to the existence of transition metals. All structures were fully relaxed with cutoff energy of 500 eV, energy convergence of 10<sup>-5</sup> eV, and force convergence of 0.01 eV/Å. The Monkhorst–Pack *K*-point sampling grids were 7 × 7 × 1 for unit cells, and 2 × 2 × 1 for 4 × 4 × 1 supercells, respectively. Hydrogen evolution reaction was computed based on the J. K. Nørskov model.<sup>4</sup> Both entropy and zero-point energy corrections were considered at 298.15 K to obtain the Gibbs free energy change, as follows:

$$\Delta G_{*H} = \Delta E_{*H} + \Delta E_{ZPE} - T\Delta S_{*H} \quad (1)$$

where  $\Delta E_{*H}$ ,  $\Delta E_{ZPE}$ ,  $T$ , and  $\Delta S_{*H}$  stand for the free energy of H adsorption, zero-point energy, temperature, and entropy correction, respectively.  $\Delta E_{*H}$  was computed using the following equation:

$$\Delta E_{*H} = E_{\text{Catalyst} + \text{H}} - E_{\text{Catalyst}} - 0.5 * E_{\text{H}_2} \quad (2)$$

where  $E_{\text{Catalyst} + \text{H}}$  is the total energy of the catalyst model after H adsorption,  $E_{\text{Catalyst}}$  is the total energy of the catalyst, and  $E_{\text{H}_2}$  is the total energy of an isolated  $\text{H}_2$  molecule. The term  $T\Delta S_{*H}$  primarily arises from the entropy loss of the reference state (gaseous  $\text{H}_2$ ). According to  $\Delta G_{*H}$ , the hydrogen evolution exchange current density (i) was computed using the following equation:

$$i = -ek_0 \frac{1}{1 + \exp\left(\frac{|\Delta G_{*H}|}{k_B T}\right)} \quad (3)$$

where  $e$ ,  $k_0$ , and  $k_B$  represent electron, the rate constant (set as  $200 \text{ s}^{-1} \text{ site}^{-1}$ ), and Boltzmann constant, respectively.<sup>4</sup> The climbing-image nudged elastic band (CI-NEB) method was used to reveal the reaction mechanism of hydrogen evolution.<sup>5</sup> The dynamics stability was verified using the *Ab initio* molecular dynamics (AIMD) simulation at 300 K lasting 5 ps with 1 fs each step.<sup>6</sup> The electronic and structural analysis (VESTA) software was employed to visualize the crystal structure.<sup>7</sup> The nonlocal Heyd-Scuseria-Ernzerhof (HSE06) hybrid functional was employed to compute the electronic band structures of these candidates.<sup>8</sup>

**Table S1** The valence electron, orbital angular momentum (L), spin angular momentum (S), and total angular momentum (J) for each element.

| Element | Valence electron                                                | Orbital angular momentum (L) | Spin angular momentum (S) | Total angular momentum (J) | Group level                   |
|---------|-----------------------------------------------------------------|------------------------------|---------------------------|----------------------------|-------------------------------|
| Sc      | 3p <sup>6</sup> 3d <sup>1</sup> 4s <sup>2</sup>                 | 2                            | 1/2                       | 3/2                        | <sup>2</sup> D <sub>3/2</sub> |
| Ti      | 3d <sup>2</sup> 4s <sup>2</sup>                                 | 3                            | 1                         | 2                          | <sup>3</sup> F <sub>2</sub>   |
| V       | 3p <sup>6</sup> 3d <sup>3</sup> 4s <sup>2</sup>                 | 3                            | 3/2                       | 3/2                        | <sup>4</sup> F <sub>3/2</sub> |
| Cr      | 3d <sup>5</sup> 4s <sup>1</sup>                                 | 0                            | 3                         | 3                          | <sup>7</sup> S <sub>3</sub>   |
| Y       | 4s <sup>2</sup> 4p <sup>6</sup> 4d <sup>1</sup> 5s <sup>2</sup> | 2                            | 1/2                       | 3/2                        | <sup>2</sup> D <sub>3/2</sub> |
| Zr      | 4s <sup>2</sup> 4p <sup>6</sup> 4d <sup>2</sup> 5s <sup>2</sup> | 3                            | 1                         | 2                          | <sup>3</sup> F <sub>2</sub>   |
| Nb      | 4p <sup>6</sup> 4d <sup>4</sup> 5s <sup>1</sup>                 | 2                            | 5/2                       | 1/2                        | <sup>6</sup> D <sub>1/2</sub> |
| Mo      | 4p <sup>6</sup> 4d <sup>5</sup> 5s <sup>1</sup>                 | 0                            | 3                         | 3                          | <sup>7</sup> S <sub>3</sub>   |
| Hf      | 5d <sup>2</sup> 6s <sup>2</sup>                                 | 3                            | 1                         | 2                          | <sup>3</sup> F <sub>2</sub>   |
| Ta      | 5d <sup>3</sup> 6s <sup>2</sup>                                 | 3                            | 3/2                       | 3/2                        | <sup>4</sup> F <sub>3/2</sub> |
| W       | 5d <sup>4</sup> 6s <sup>2</sup>                                 | 2                            | 2                         | 0                          | <sup>5</sup> D <sub>0</sub>   |
| O       | 2s <sup>2</sup> 2p <sup>4</sup>                                 | 1                            | 1                         | 2                          | <sup>3</sup> P <sub>2</sub>   |
| S       | 3s <sup>2</sup> 3p <sup>4</sup>                                 | 1                            | 1                         | 2                          | <sup>3</sup> P <sub>2</sub>   |
| Se      | 4s <sup>2</sup> 4p <sup>4</sup>                                 | 1                            | 1                         | 2                          | <sup>3</sup> P <sub>2</sub>   |
| Te      | 5s <sup>2</sup> 5p <sup>4</sup>                                 | 1                            | 1                         | 2                          | <sup>3</sup> P <sub>2</sub>   |

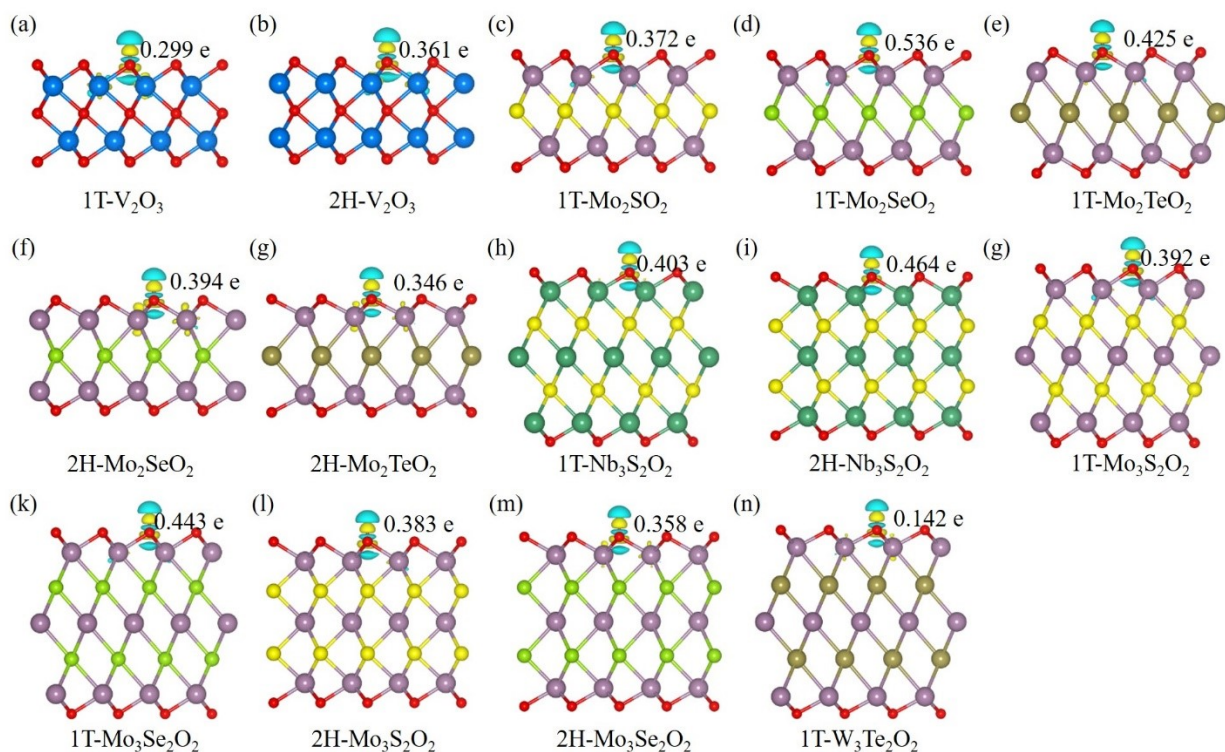

**Fig. S1** Charge density difference for (a) 1T-V<sub>2</sub>O<sub>3</sub>, (b) 2H-V<sub>2</sub>O<sub>3</sub>, (c) 1T-Mo<sub>2</sub>SO<sub>2</sub>, (d) 1T-Mo<sub>2</sub>SeO<sub>2</sub>, (e) 1T-Mo<sub>2</sub>TeO<sub>2</sub>, (f) 2H-Mo<sub>2</sub>SeO<sub>2</sub>, (g) 2H-Mo<sub>2</sub>TeO<sub>2</sub>, (h) 1T-Nb<sub>3</sub>S<sub>2</sub>O<sub>2</sub>, (i) 2H-Nb<sub>3</sub>S<sub>2</sub>O<sub>2</sub>, (j) 1T-Mo<sub>3</sub>S<sub>2</sub>O<sub>2</sub>, (k) 1T-Mo<sub>3</sub>Se<sub>2</sub>O<sub>2</sub>, (l) 2H-Mo<sub>3</sub>S<sub>2</sub>O<sub>2</sub>, (m) 2H-Mo<sub>3</sub>Se<sub>2</sub>O<sub>2</sub>, and (n) 1T-W<sub>3</sub>Te<sub>2</sub>O<sub>2</sub>, respectively.

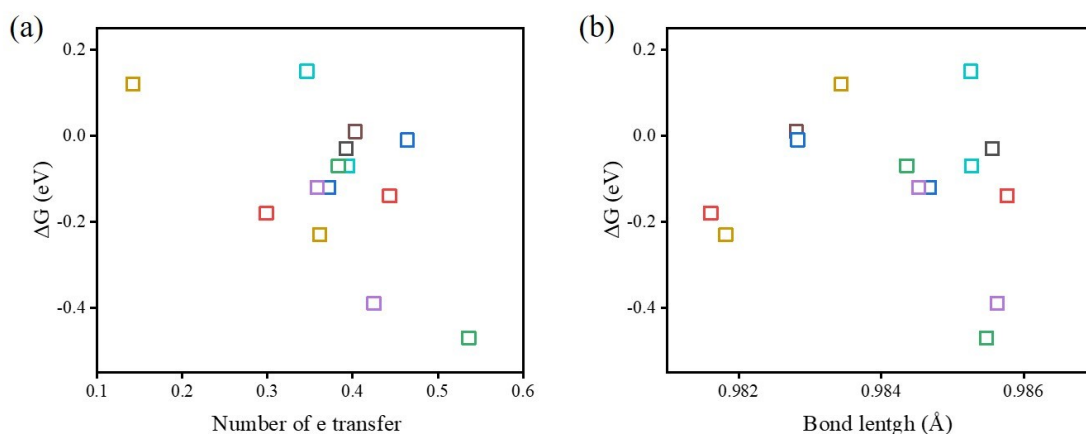

**Fig. S2** (a) The relationship between  $\Delta G^*_{\text{H}}$  and number of electron transfer during hydrogen adsorption. (b) The relationship between  $\Delta G^*_{\text{H}}$  and O-H bond.

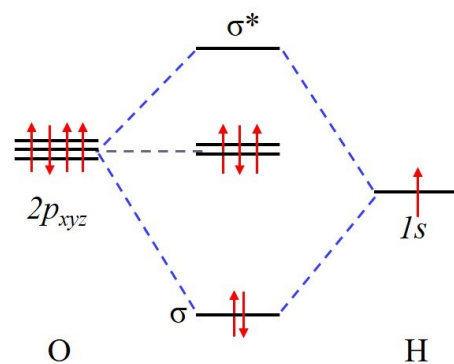

**Fig. S3** The hybridization between O-2p and H-1s orbitals.

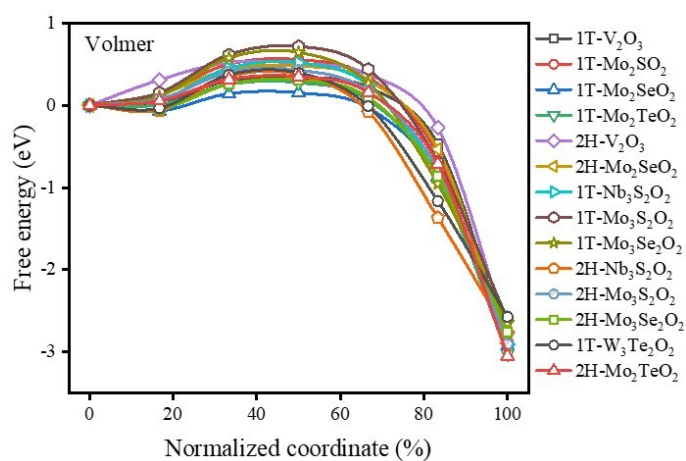

**Fig. S4** The relationship between free energy and normalized pathway for Volmer reaction.

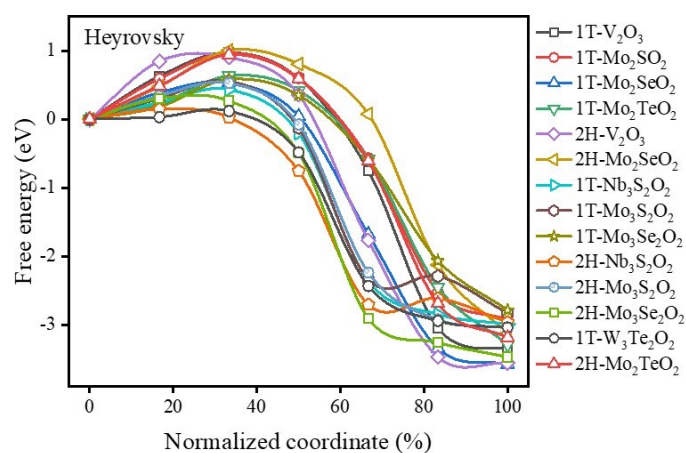

**Fig. S5** The relationship between free energy and normalized pathway for Heyrovsky reaction.

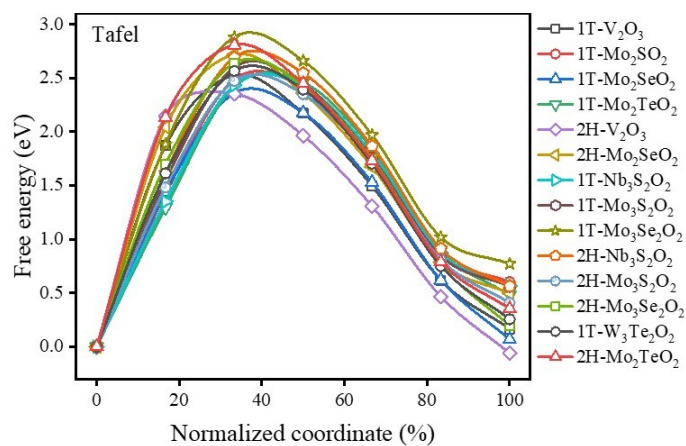

**Fig. S6** The relationship between free energy and normalized pathway for Tafel reaction.

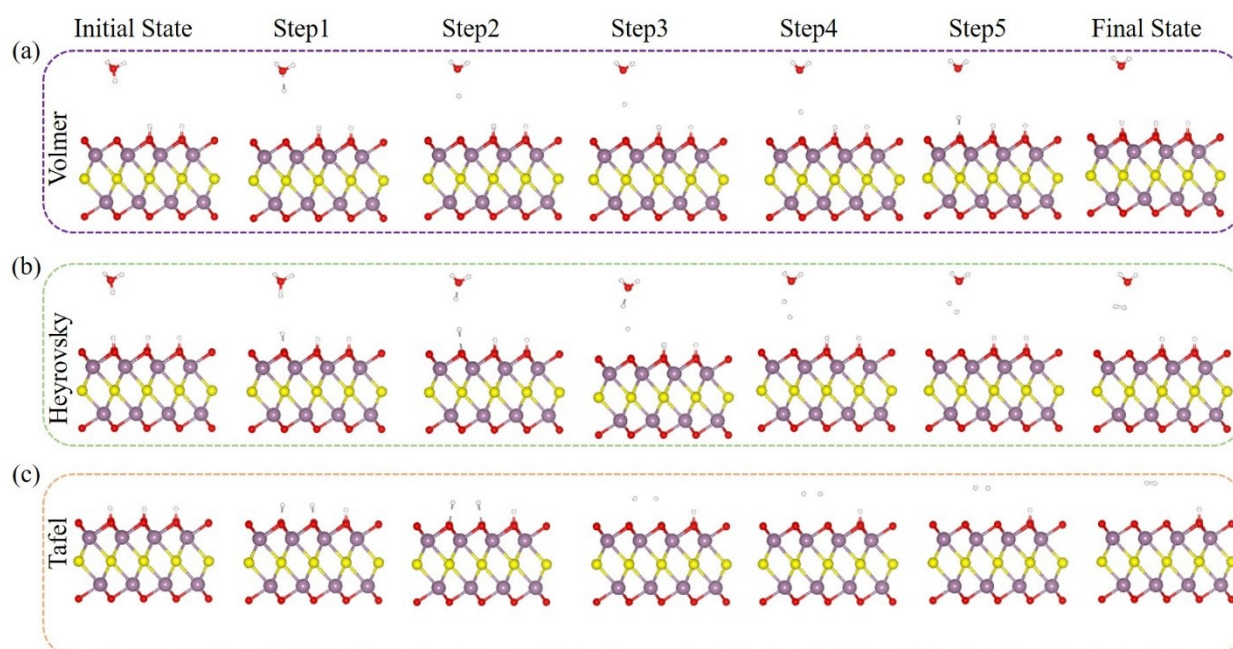

**Fig. S7** Schematic structures for (a) Volmer, (b) Heyrovsky, and (c) Tafel reactions from CINEB calculations, respectively.



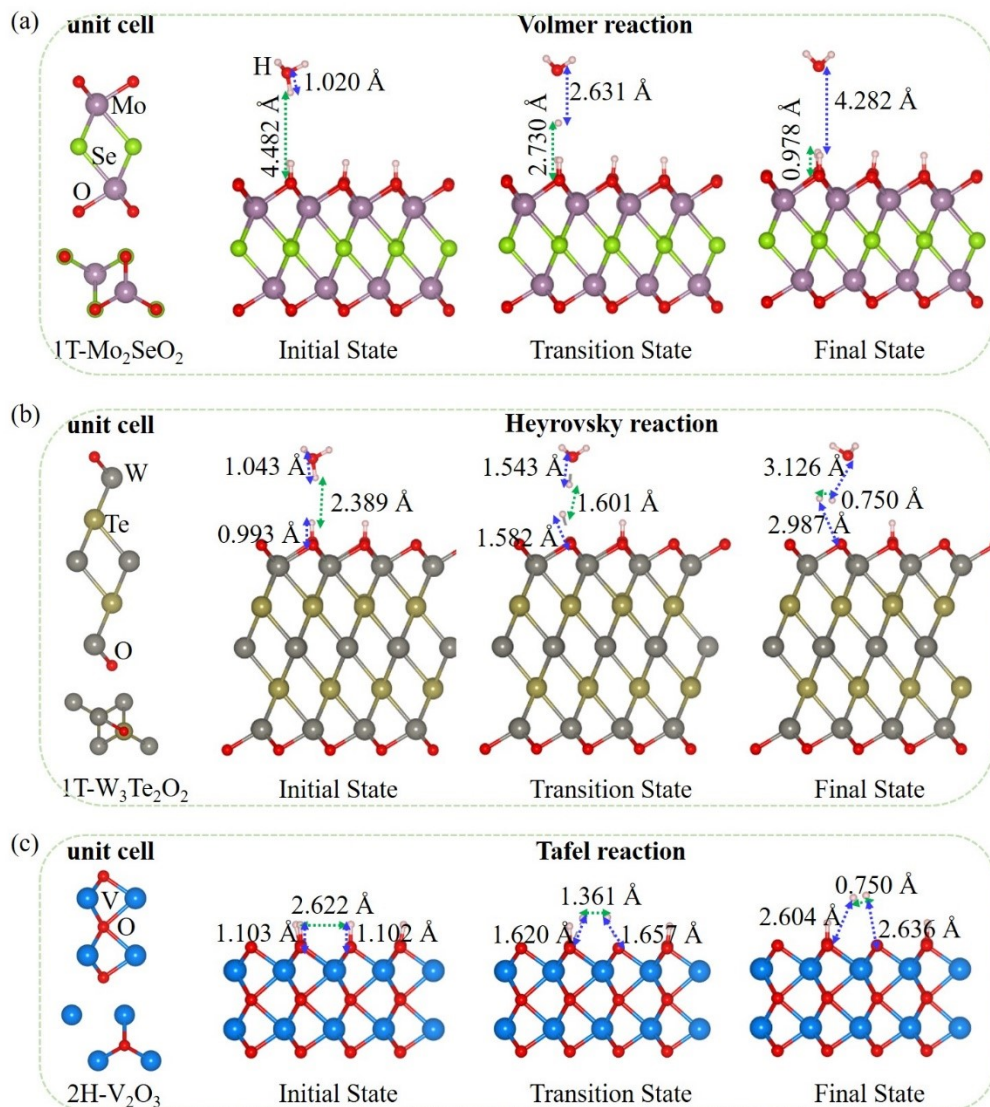

**Fig. S8** The accurate geometries for each of the most favorable cases (a) 1T-Mo<sub>2</sub>SeO<sub>2</sub> for Volmer reaction, (b) 1T-W<sub>3</sub>Te<sub>2</sub>O<sub>2</sub> for Heyrovsky reaction, and (c) 2H-V<sub>2</sub>O<sub>3</sub> for Tafel reaction. The left is the unit cell for each chemical composition. The distances for O-H and H-H are provided.

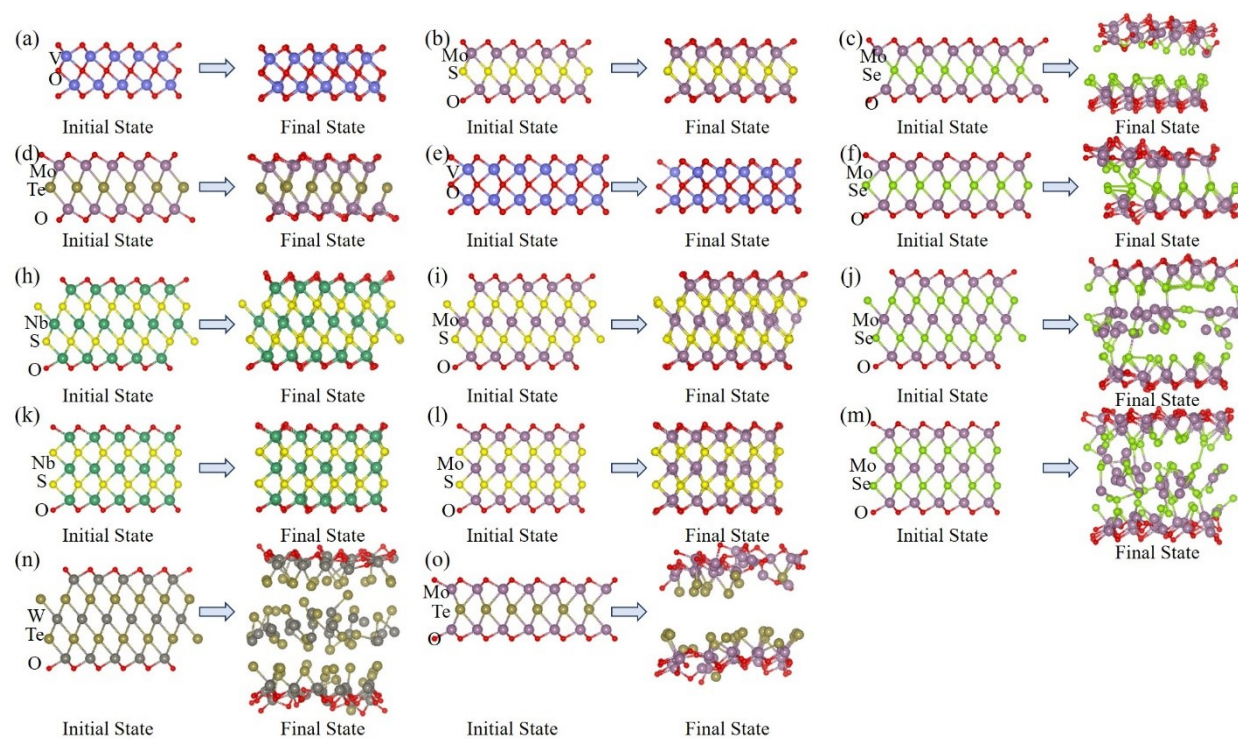

**Fig. S9** Initial and final states for 14 MOenes from AIMD simulations.



**Table S2** The thermodynamic competitors for 14 candidates, and the corresponding formation energy from first-principles calculations.

| <b>MOenes</b>                                     | <b>Competitors</b>                                                    | <b>E<sub>formation</sub> (eV/atom)</b> |
|---------------------------------------------------|-----------------------------------------------------------------------|----------------------------------------|
| 1T-V <sub>2</sub> O <sub>3</sub>                  | V <sub>2</sub> O <sub>5</sub> , VO                                    | -0.239                                 |
| 1T-Mo <sub>2</sub> SO <sub>2</sub>                | MoS <sub>2</sub> , Mo <sub>4</sub> O <sub>5</sub> , MoO <sub>2</sub>  | 0.158                                  |
| 1T-Mo <sub>2</sub> SeO <sub>2</sub>               | MoSe <sub>2</sub> , Mo <sub>4</sub> O <sub>5</sub> , MoO <sub>2</sub> | 0.266                                  |
| 1T-Mo <sub>2</sub> TeO <sub>2</sub>               | MoTe <sub>2</sub> , Mo <sub>4</sub> O <sub>5</sub> , MoO <sub>2</sub> | 0.301                                  |
| 1T-Nb <sub>3</sub> S <sub>2</sub> O <sub>2</sub>  | NbS <sub>2</sub> , NbO                                                | 0.171                                  |
| 1T-Mo <sub>3</sub> S <sub>2</sub> O <sub>2</sub>  | MoS <sub>2</sub> , Mo <sub>2</sub> O, MoO <sub>2</sub>                | -0.226                                 |
| 1T-Mo <sub>3</sub> Se <sub>2</sub> O <sub>2</sub> | MoSe <sub>2</sub> , Mo <sub>2</sub> O, MoO <sub>2</sub>               | -0.085                                 |
| 1T-W <sub>3</sub> Te <sub>2</sub> O <sub>2</sub>  | WTe <sub>2</sub> , W <sub>3</sub> O, WO <sub>2</sub>                  | 0.207                                  |
| 2H-V <sub>2</sub> O <sub>3</sub>                  | V <sub>2</sub> O <sub>5</sub> , VO                                    | -0.278                                 |
| 2H-Mo <sub>2</sub> SeO <sub>2</sub>               | MoSe <sub>2</sub> , Mo <sub>4</sub> O <sub>5</sub> , MoO <sub>2</sub> | 0.34                                   |
| 2H-Mo <sub>2</sub> TeO <sub>2</sub>               | MoTe <sub>2</sub> , Mo <sub>4</sub> O <sub>5</sub> , MoO <sub>2</sub> | 0.378                                  |
| 2H-Nb <sub>3</sub> S <sub>2</sub> O <sub>2</sub>  | NbS <sub>2</sub> , NbO                                                | 0.171                                  |
| 2H-Mo <sub>3</sub> S <sub>2</sub> O <sub>2</sub>  | MoS <sub>2</sub> , Mo <sub>2</sub> O, MoO <sub>2</sub>                | -0.241                                 |
| 2H-Mo <sub>3</sub> Se <sub>2</sub> O <sub>2</sub> | MoSe <sub>2</sub> , Mo <sub>2</sub> O, MoO <sub>2</sub>               | -0.036                                 |

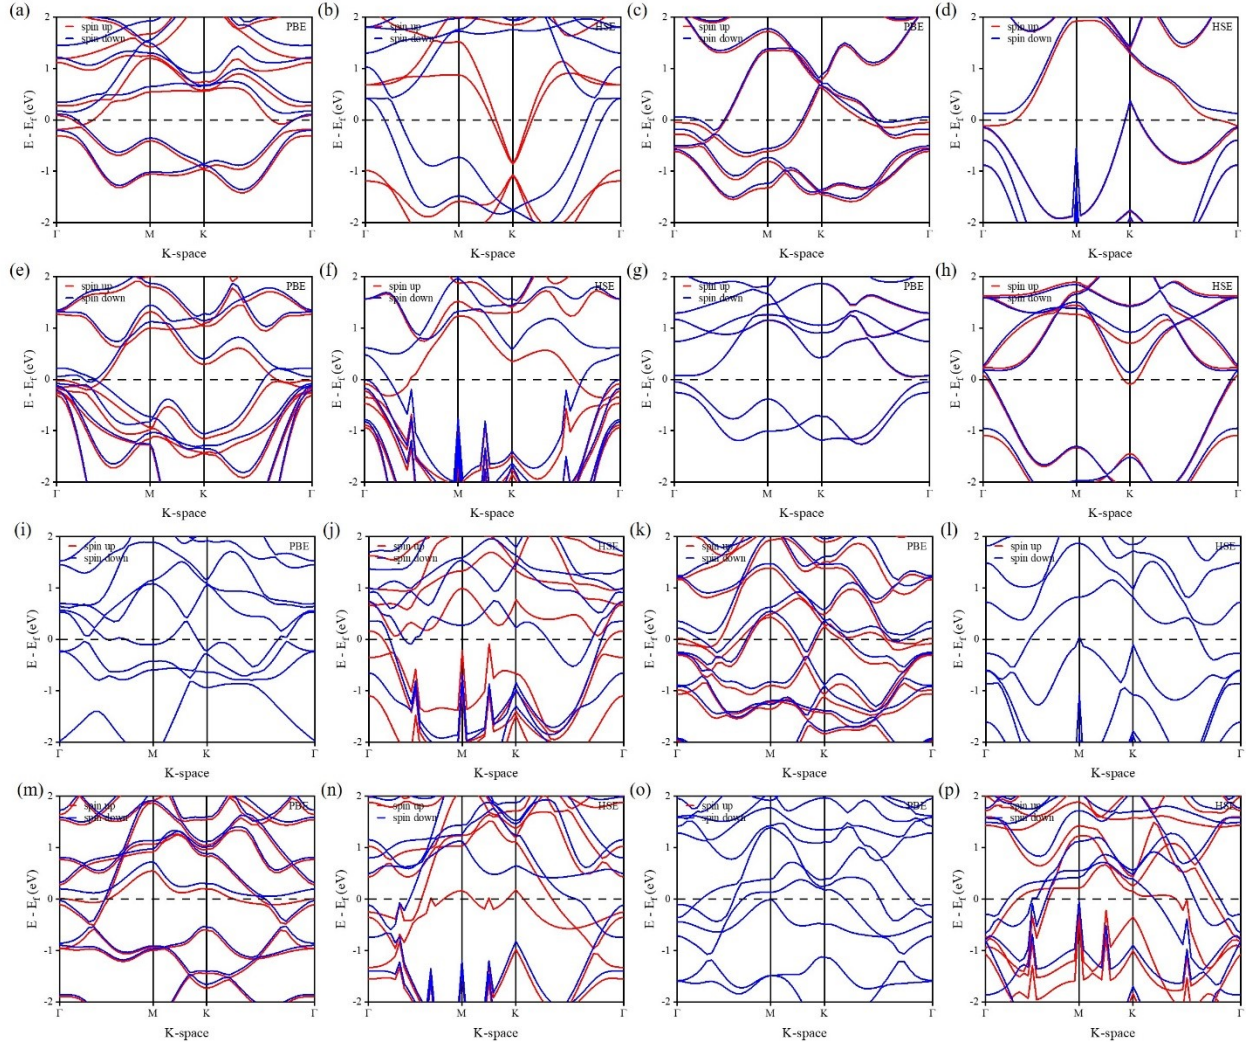

**Fig. S10** Electronic band structures for 1T-V<sub>2</sub>O<sub>3</sub> from (a) PBE and (b) HSE06 calculations, 1T-Mo<sub>2</sub>SO<sub>2</sub> from (c) PBE and (d) HSE06 calculations, 1T-Mo<sub>2</sub>TeO<sub>2</sub> from (e) PBE and (f) HSE06 calculations, 2H-V<sub>2</sub>O<sub>3</sub> from (g) PBE and (h) HSE06 calculations, 1T-Nb<sub>3</sub>S<sub>2</sub>O<sub>2</sub> from (i) PBE and (j) HSE06 calculations, 1T-Mo<sub>3</sub>S<sub>2</sub>O<sub>2</sub> from (k) PBE and (l) HSE06 calculations, 2H-Nb<sub>3</sub>S<sub>2</sub>O<sub>2</sub> from (m) PBE and (n) HSE06 calculations, 2H-Mo<sub>3</sub>S<sub>2</sub>O<sub>2</sub> from (o) PBE and (p) HSE06 calculations, respectively.

## References

- S1 G. Kresse and J. Furthmüller, *Phys. Rev. B*, 1996, **54**, 11169-11186.
- S2 P. E. Blöchl, *Phys. Rev. B*, 1994, **50**, 17953-17979.
- S3 S. Grimme, J. Antony, S. Ehrlich and H. A Krieg, *J. Chem. Phys.*, 2010, **132**, 154104.
- S4 J. K. Nørskov, T. Bligaard, A. Logadottir, J. R. Kitchin, J. G. Chen, S. Pandelov and U. Stimming, *J. Electrochem. Soc.*, 2005, **152**, J23-J26.
- S5 K. Mathew, R. Sundararaman, K. Letchworth-Weaver, T. A. Arias and R. G. Hennig, *J. Chem. Phys.*, 2014, **140**, 084106.
- S6 S. Nosé, *J. Chem. Phys.*, 1984, **81**, 511.
- S7 K. Momma and F. Izumi, *J. Appl. Cryst.*, 2011, **44**, 1272–1276.
- S8 J. Heyd, G. E. Scuseria and M. Ernzerhof, *J. Chem. Phys.*, 2003, **118**, 8207.
